# Supplementary material for: Risk of Malnutrition and Impact on Treatment Outcomes Among Gynecological Cancer Patients in Two Cancer Centers, Kigali, Rwanda
Source: Research Square preprint supplement (doi:10.21203/rs.3.rs-8490095/v1), 2026-01-30
Supplement: Supplementary file 1 [file 69e3a2188fed7cc2fb41c84a.docx]

Table 3: Rates of malnutrition according to cancer type and stage

**PG-SGA score for malnutrition**

**Variables OR (95% CI) P value**

**Normal Malnutrition**

| **Type of cancer** |  |  |  |  |
| --- | --- | --- | --- | --- |
| Ovarian | 29 (43.28%) | 38 (56.72%) | 8.52 (1.78-40.74) | 0.007 |
| Cervical | 103 (75.74%) | 33 (24.26%) | 2.08 (0.45-9.71) | 0.35 |
| Endometrial | 17 (53.13%) | 15 (46.88%) | 5.73 (1.11-29.64) | 0.037 |
| Vulvar | 18 (94.74%) | 1 (5.26%) | 0.36 (0.03-4.41) | 0.425 |
| GTN | 13 (86.67%) | 2 (13.33%) | Ref |  |
| Vagina | 2 (66.67%) | 1 (33.33%) | 3.24 (0.19-54.77) | 0.413 |
| **Cancer stage** |  |  |  |  |
| I | 70 (79.55%) | 18 (20.45%) | Ref |  |
| II | 57 (90.48%) | 6 (9.52%) | 0.41 (0.15-1.09) | 0.076 |
| III | 46 (50.55%) | 45 (49.45%) | 3.80 (1.96-7.37) | <0.001 |
| IV | 9 (30.0%) | 21 (70.00%) | 9.07 (3.55-23.16) | <0.001 |
