# Supplementary material for: Risk of Malnutrition and Impact on Treatment Outcomes Among Gynecological Cancer Patients in Two Cancer Centers, Kigali, Rwanda
Source: Research Square preprint supplement (doi:10.21203/rs.3.rs-8490095/v1), 2026-01-30
Supplement: Supplementary file 2 [file 9584c87d646e63c986efa1c1.docx]

Table 5: Multivariable logistic regression analysis of predictors of malnutrition among patients with gynecological cancer (Final model)

| **Predictors** | **AOR** | **95% CI** | **SE** | **P value** |
| --- | --- | --- | --- | --- |
| **Cancer stage**  Stage I | ref |  |  |  |
| Stage II | 0.57 | 0.15-2.08 | 0.3753674 | 0.39 |
| Stage III | 2.54 | 1.01-6.37 | 1.191149 | 0.047 |
| Stage IV | 1.74 | 0.47-6.48 | 1.167648 | 0.408 |
| **Type of cancer**  Ovarian | 31.12 | 3.74-258.62 | 33.62486 | 0.001 |
| Cervical | 3.48 | 0.49-24.59 | 3.471157 | 0.212 |
| Vulvar | 0.55 | 0.02-9.95 | 0.8081419 | 0.682 |
| Endometrial | 19.24 | 2.17-169.92 | 21.38431 | 0.008 |
| GTN | ref |  |  |  |
| Vagina | 11.62 | 0.12-1119.32 | 27.0722 | 0.293 |
| Post  **Postoperative morbidity**  Yes | 31.24 | 12.1-80.12 | 15.01204 | <0.001 |
| No | ref |  |  |  |

*AOR: Adjusted Odds ratio*
