# Supplementary material for: Risk of Malnutrition and Impact on Treatment Outcomes Among Gynecological Cancer Patients in Two Cancer Centers, Kigali, Rwanda
Source: Research Square preprint supplement (doi:10.21203/rs.3.rs-8490095/v1), 2026-01-30
Supplement: Supplementary file 3 [file d39af86fc3504252aea2d263.docx]

Table 2: Relationship between anthropometric and biochemical measures and malnutrition

**Variables**

**PG**

**-**

**SGA score for malnutrition**

**P value**

**Normal**

**Malnutrition**

| Age [Median (IRQ) | 52 (44-62) | 62 (48-71) | 0.002 |
| --- | --- | --- | --- |
| BMI [Median (IRQ) | 23.35 (21.1-26.4) | 20.05 (17.9-22.7) | <0.001 |
| Hemoglobin [Median (IRQ) | 13 (12-14) | 12 (10-13.6) | <0.001 |
| Serum albumin [Median (IRQ) | 41 (39-43) | 34 (28.8-38.0) | <0.001 |
| Creatinine [Median (IRQ) | 69 (61-79) | 72 (62-90) | 0.1 |
