# Supplementary material for: Risk of Malnutrition and Impact on Treatment Outcomes Among Gynecological Cancer Patients in Two Cancer Centers, Kigali, Rwanda
Source: Research Square preprint supplement (doi:10.21203/rs.3.rs-8490095/v1), 2026-01-30
Supplement: Supplementary file 4 [file da35a88a0bf836e587cf1eab.docx]

Table 1: Sociodemographic characteristics of study participants

**Characteristics Age in years**

**n**

**%**

| Median (IQR)  **Age category in years** | 54 (44-65) | | |
| --- | --- | --- | --- |
| <35 | 23 |  | 8.46 |
| 35-45 | 54 |  | 19.85 |
| 46-65 | 131 |  | 48.16 |
| >65  **Body mass index** | 64 |  | 23.53 |
| Undernutrition | 31 |  | 11.4 |
| Normal | 166 |  | 61.03 |
| Overweight | 57 |  | 20.96 |
| Obese  **Parity** | 18 |  | 6.62 |
| Median (IQR)  **Category** |  | 5 (3-7) |  |
| Nulliparous | 17 |  | 6.25 |
| 1 to 4 | 114 |  | 41.91 |
| >4  **Alcohol consumption** | 141 | | 51.84 |
| Yes | 113 | | 41.54 |
| No | 159 | | 58.46 |
