# Supplementary material for: Risk of Malnutrition and Impact on Treatment Outcomes Among Gynecological Cancer Patients in Two Cancer Centers, Kigali, Rwanda
Source: Research Square preprint supplement (doi:10.21203/rs.3.rs-8490095/v1), 2026-01-30
Supplement: Supplementary file 5 [file dfc584f226e4f3f426316dc4.docx]

Table 4: Sociodemographic and clinical factors associated with malnutrition among patients with gynecological cancer

**Risk factor**

**Malnutrition**

**C**

**OR (95% CI)**

**P value**

**Yes**

**No**

| **Age** |  |  |  |  |
| --- | --- | --- | --- | --- |
| <35 | 11 (47.83%) | 12 (52.17%) |  |  |
| 35-45 | 8 (14.81%) | 46 (85.19%) | 0.19 (0.06-0.57) | 0.003 |
| 46-65 | 36 (27.48%) | 95 (72.52%) | 0.41 (0.17-1.02) | 0.055 |
| >65  **Parity** | 35 (54.69%) | 29 (45.31%) | 1.32 (0.51-3.42) | 0.572 |
| Nulliparous | 10 (58.82%) | 7 (41.18%) | 2.95 (1.05-8.25) | 0.039 |
| 1 to 4 | 34 (29.82%) | 80 (70.18%) | 0.87 (0.51-1.49) | 0.632 |
| >4  **Surgery** | 46 (32.62%) | 95 (67.38%) |  |  |
| Yes | 51 (38.64%) | 81 (61.36%) | 1.63 (0.97-2.71) | 0.06 |
| No  **Any chronic disease** | 39 (27.86%) | 101 (72.14%) |  |  |
| Yes | 26 (31.33%) | 57 (68.67%) | 0.89 (0.51-1.55) | 0.682 |
| No  **Alcohol consumption** | 64 (33.86%) | 125 (66.14%) |  |  |
| Yes | 29 (34.51%) | 74 (65.49%) | 1.11 (0.67-1.86) | 0.674 |
| No  **Economic category** | 51 (32.08%) | 108 (67.92%) |  |  |
| Category I | 3 (37.50%) | 5 (62.50%) | 2.13 (0.42-10.68) | 0.357 |
| Category II | 78 (34.98%) | 145 (65.02%) | 1.91 (0.86-4.21) | 0.107 |
| Category III  **Postoperative morbidity** | 9 (21.95%) | 32 (78.05%) |  |  |
| Yes | 32 (35.55%) | 8 (4.40%) | 12 (5.23-27.51) | <0.001 |

No 58 (64.44%) 174 (95.60%)

*COR: Crude odds ratio*
